# Supplementary material for: Genetics, Synergists, and Age Affect Insecticide Sensitivity of the Honey Bee, Apis mellifera
Source: PubMed Central journal article supplement (PMC4592006; doi:10.1371/journal.pone.0139841), 2015-10-02

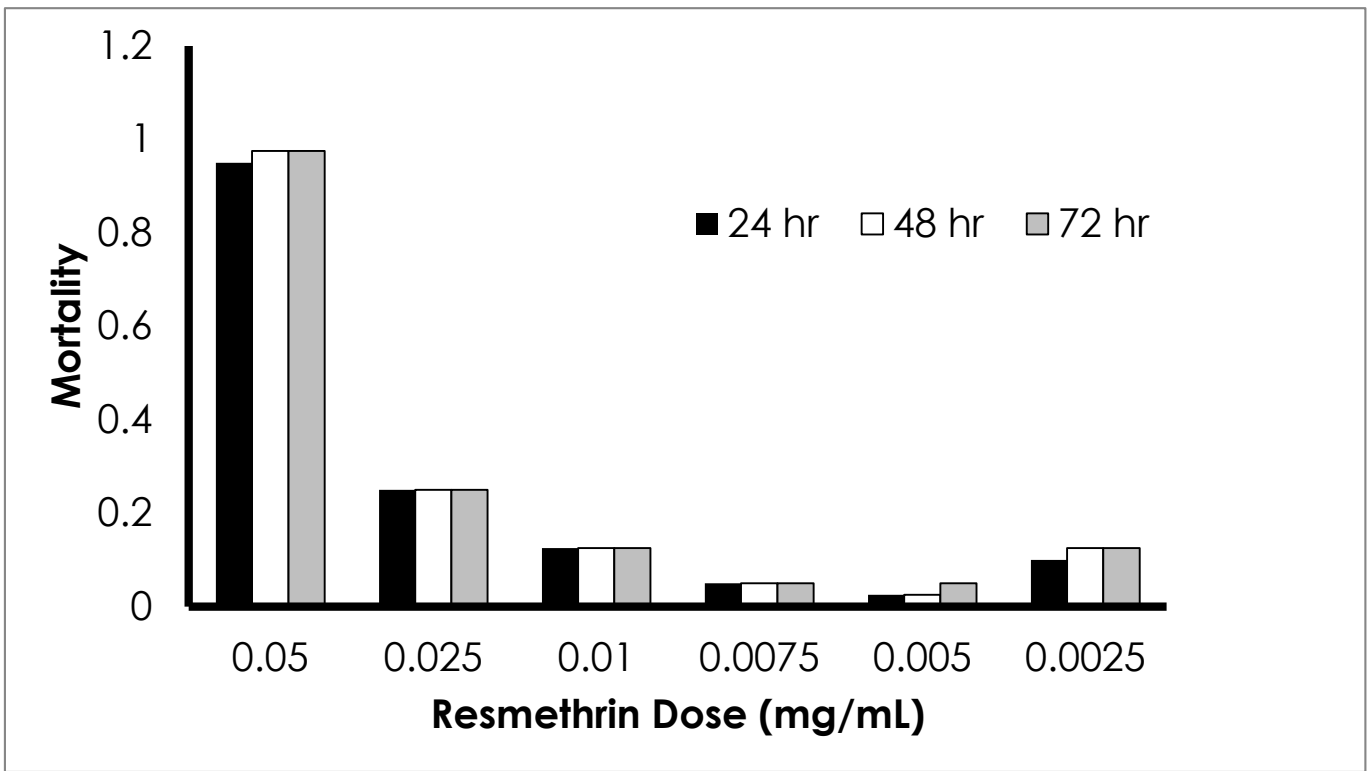

Supplement: pone.0139841.s003.pdf [file pone.0139841.s003.pdf]
